# Supplementary material for: Unspecific peroxygenase immobilization in 3D-printed microfluidics: towards tailor-made screening platforms
Source: Royal Society of Chemistry journal article supplement (doi:10.1039/d4cy00869c), 2024-01-01
Supplement: d4cy00869c1.pdf [file d4cy00869c1.pdf]

## Unspecific peroxygenase immobilization in 3D-printed microfluidics: Towards tailor-made screening platforms

Elena Gkantzou<sup>a</sup>, Theofilia Koulopoulou<sup>a</sup>, Hannah Brass<sup>b</sup>, David Schönauer<sup>b</sup>, Anton Glieder<sup>c</sup>,  
and Selin Kara<sup>a,d\*</sup>

<sup>a</sup> Institute of Technical Chemistry, Leibniz University Hannover, Callinstrasse 5, DE-30167, Hannover, Germany.

<sup>b</sup> Aminoverse B.V., Daelderweg 9, NL-6361HK Nuth, Netherlands.

<sup>c</sup> Bisy GmbH, Wünschendorf 292, 8200 Hofstätten an der Raab, Austria.

<sup>d</sup> Biocatalysis and Bioprocessing Group, Department of Biological and Chemical Engineering, Aarhus University, Gustav Wieds Vej 10, DK-8000 Aarhus, Denmark.

\* corresponding author: [selin.kara@iftc.uni-hannover.de](mailto:selin.kara@iftc.uni-hannover.de)

### SUPPLEMENTARY INFORMATION

**Table S1:** Investigation of UPO substrates ABTS and H<sub>2</sub>O<sub>2</sub> concentration under flow conditions. Enzymatic activity measurement conditions: citrate phosphate buffer (100 mM at pH 4.4), T = 25°C, flow rate = 10 μL/min, reactor volume = 20 μL. One unit (U) of enzymatic activity is the amount of enzyme that converts one μmol of substrate per minute, under the specified conditions.

| ABTS (mM) | H <sub>2</sub> O <sub>2</sub> (mM) | U (μmol·min <sup>-1</sup> ) |
|-----------|------------------------------------|-----------------------------|
| 0.3       | 3                                  | 0.0008                      |
| 1         | 3                                  | 0.0026                      |
| 3         | 3                                  | 0.0044                      |
| 5         | 3                                  | 0.0033                      |
| 1         | 0.5                                | 0.0018                      |
| 1         | 1                                  | 0.0024                      |
| 1         | 3                                  | 0.0027                      |
| 1         | 5                                  | 0.0017                      |

**Table S2:** Supplementary data to Figure 3a. Analytical yields of the UPO-immobilized microreactor for different substrate concentrations (0.3 – 5 mM). Yields are calculated by applying the Beer-Lamberts law for ABTS<sup>+</sup> concentration calculation. Measurement conditions: c(ABTS) = 1 mM, c(H<sub>2</sub>O<sub>2</sub>) = 3 mM, citrate buffer (100 mM at pH 4.4), T = 25°C, reactor volume = 20 μL.

| Flow rate (μL/min) | Analytical Yield (%) |        |        |        |
|--------------------|----------------------|--------|--------|--------|
|                    | 0.3 mM               | 1 mM   | 3 mM   | 5 mM   |
| 20                 | 57.583               | 32.851 | 34.501 | 17.536 |
| 10                 | 30.333               | 25.196 | 14.642 | 6.621  |
| 5                  | 12.939               | 20.283 | 62.273 | 67.934 |
| 2.5                | 3.946                | 3.270  | 10.258 | 8.3579 |

**Table S3:** Supplementary data to Figure 2b. Application of different substrate concentrations and different flow rates for kinetic constants determination. Measurement conditions: c(ABTS) = 1 mM, c(H<sub>2</sub>O<sub>2</sub>) = 3 mM, citrate buffer (100 mM at pH 4.4), T = 25°C, reactor volume = 20 μL.

| Flow rate (μL/min) | K <sub>M,app</sub> (mM) |
|--------------------|-------------------------|
| 20                 | 0.979                   |
| 10                 | 1.677                   |
| 5                  | 2.981                   |
| 2.5                | 3.944                   |

**Table S4:** Supplementary data to Figure 4. Operational stability of the UPO-immobilized microreactor. Activity measurement conditions:  $c(\text{ABTS}) = 1 \text{ mM}$ ,  $c(\text{H}_2\text{O}_2) = 1 \text{ mM}$ , citrate buffer (100 mM at pH 4.4),  $T = 25^\circ\text{C}$ , flow rate = 10  $\mu\text{L}/\text{min}$ , reactor volume = 20  $\mu\text{L}$ .

| <b>Cycles of use</b> | <b>Remaining activity (%)</b> |
|----------------------|-------------------------------|
| 1                    | 100                           |
| 2                    | 104.267                       |
| 3                    | 101.067                       |
| 4                    | 94.133                        |
| 5                    | 97.867                        |
| 6                    | 94.4                          |
| 7                    | 93.067                        |
| 8                    | 91.2                          |
| 9                    | 77.867                        |
| 10                   | 80.267                        |
| 11                   | 77.867                        |
| 12                   | 74.667                        |
| 13                   | 72.267                        |
| 14                   | 69.333                        |
| 15                   | 68.267                        |
| 16                   | 64.8                          |
| 17                   | 60                            |
| 18                   | 54.4                          |
| 19                   | 54.133                        |
| 20                   | 53.067                        |
| 21                   | 46.667                        |
| 22                   | 45.867                        |
| 23                   | 46.133                        |
| 24                   | 43.467                        |
| 25                   | 42.133                        |
| 26                   | 39.2                          |
| 27                   | 38.667                        |
| 28                   | 38.933                        |
| 29                   | 34.667                        |
| 30                   | 38.133                        |
| 31                   | 28.8                          |
| 32                   | 30.933                        |
| 33                   | 31.733                        |
| 34                   | 32                            |
| 35                   | 29.867                        |
| 36                   | 28.267                        |
| 37                   | 28.267                        |
| 38                   | 28.267                        |
| 39                   | 25.481                        |
| 40                   | 25.473                        |
| 41                   | 25.356                        |
| 42                   | 20.483                        |
| 43                   | 19.371                        |
| 44                   | 18.489                        |
| 45                   | 17.499                        |
| 46                   | 16.355                        |
| 47                   | 13.754                        |
| 48                   | 12.258                        |
| 49                   | 9.577                         |
| 50                   | 5.1                           |
